# Supplementary material for: The mechanisms involved in the resistance of estrogen receptor-positive breast cancer cells to palbociclib are multiple and change over time
Source: PubMed Central journal article supplement (PMC8484193; doi:10.1007/s00432-021-03722-3), 2021-07-09

# Supplementary fig. 1

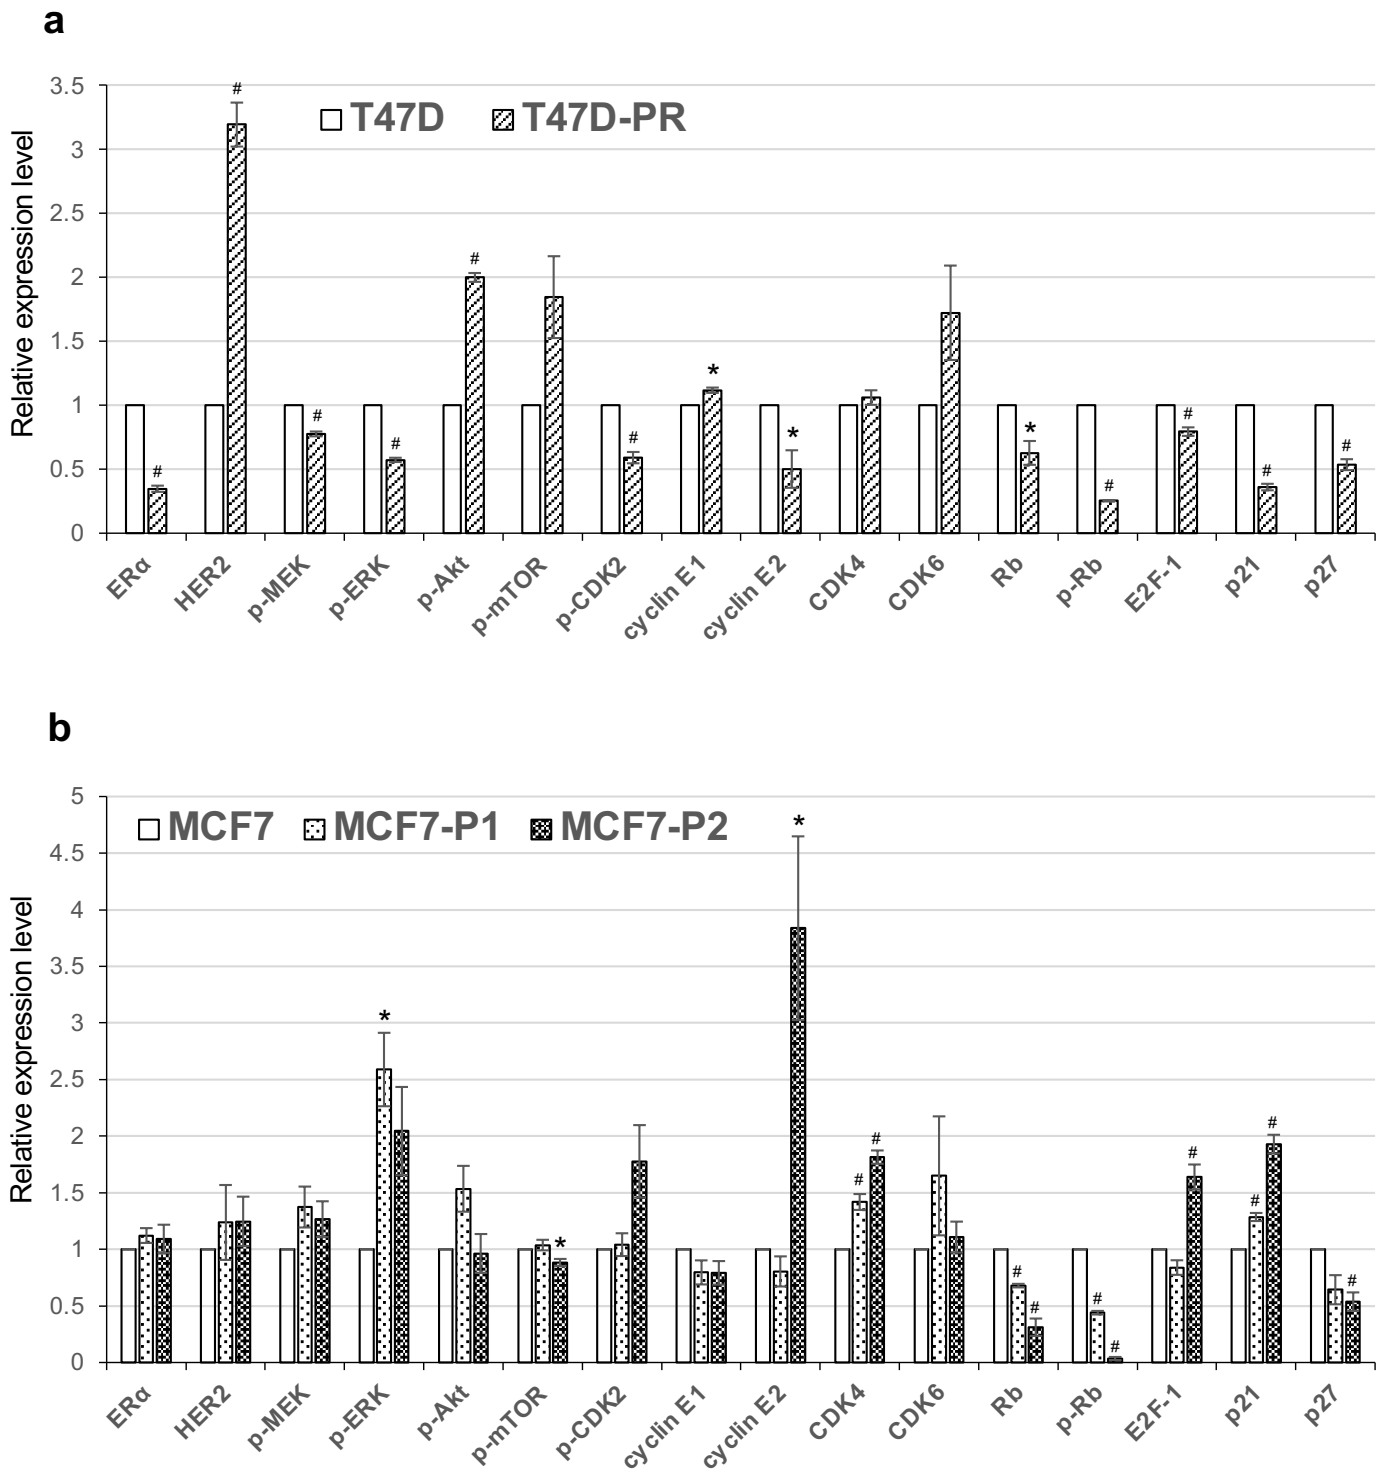

Supplement: 432_2021_3722_MOESM1_ESM.pdf [file 432_2021_3722_MOESM1_ESM.pdf]
